# Supplementary material for: Structural basis for the subtype-selectivity of KCa2.2 channel activators
Source: Research Square preprint supplement (doi:10.21203/rs.3.rs-6568445/v1), 2025-05-16
Supplement: Supplementary file 2 [file dfffe8e73db3e8ea7d5b812a.pdf]

# Supplementary Materials for

## Structural basis for the subtype-selectivity of K<sub>Ca</sub>2.2 channel activators

### Authors:

Young-Woo Nam <sup>1</sup>, Alena Ramanishka <sup>1</sup>, Yang Xu <sup>2</sup>, Rose Marie Haynes Yasuda <sup>3,4</sup>, Dohyun Im <sup>5</sup>, Meng Cui <sup>6</sup>, K. George Chandy <sup>7</sup>, Heike Wulff <sup>8</sup>, Miao Zhang <sup>1\*</sup>

### Affiliations:

<sup>1</sup> Department of Biomedical and Pharmaceutical Sciences, Chapman University School of Pharmacy; Irvine, California 92618, USA.

<sup>2</sup> Division of CryoEM and Bioimaging, Stanford Synchrotron Radiation Lightsource, SLAC National Accelerator Laboratory, Stanford University; Menlo Park, California 94025, USA.

<sup>3</sup> Pacific Northwest Center for Cryo-Electron Microscopy, Oregon Health & Science University, Portland, Oregon 97201, USA

<sup>4</sup> Pacific Northwest National Laboratory, Richland, Washington 99354, USA

<sup>5</sup> Department of Cell Biology, Graduate School of Medicine, Kyoto University; Kyoto 606-8501, Japan.

<sup>6</sup> Department of Pharmaceutical Sciences, Northeastern University School of Pharmacy; Boston, Massachusetts 02115, USA.

<sup>7</sup> LKCMedicine-ICE Collaborative Platform, Lee Kong Chian School of Medicine, Nanyang Technological University Singapore; Singapore 636921.

<sup>8</sup> Department of Pharmacology, School of Medicine, University of California Davis; Davis, California 95616, USA.

\*Corresponding author. Miao Zhang, Email: [zhang@chapman.edu](mailto:zhang@chapman.edu)

### The PDF file includes:

Supplementary Figs. 1 to 10  
Supplementary Table 1

**Supplementary Table 1 | Cryo-EM data collection, refinement and validation statistics structures**

|                                                  | NS309_K <sub>Ca</sub> 2.2<br>(EMDB-70207)<br>(PDB-9O7S) | NS309_K <sub>Ca</sub> 3.1<br>(EMDB-70275)<br>(PDB-9OA8) | Rimtuzalcap_K <sub>Ca</sub> 2.2_I<br>(EMDB-70217)<br>(PDB-9O85) | Rimtuzalcap_K <sub>Ca</sub> 2.2_II<br>(EMDB-70240)<br>(PDB-9O93) |
|--------------------------------------------------|---------------------------------------------------------|---------------------------------------------------------|-----------------------------------------------------------------|------------------------------------------------------------------|
| <b>Data collection and processing</b>            |                                                         |                                                         |                                                                 |                                                                  |
| Magnification                                    | 165,000                                                 | 105,000                                                 | 105,000                                                         | 105,000                                                          |
| Voltage (kV)                                     | 300                                                     | 300                                                     | 300                                                             | 300                                                              |
| Electron exposure (e-/Å <sup>2</sup> )           | 50                                                      | 50                                                      | 50                                                              | 50                                                               |
| Defocus range (µm)                               | -0.6 to -2.2                                            | -1.0 to -2.0                                            | -1.3 to -2.3                                                    | -1.3 to -2.3                                                     |
| Pixel size (Å)                                   | 0.73                                                    | 0.86                                                    | 0.86                                                            | 0.86                                                             |
| Symmetry imposed                                 | C4                                                      | C4                                                      | C4                                                              | C4                                                               |
| Initial particle images (no.)                    | 1,511,737                                               | 2,119,995                                               | 2,453,407                                                       | 2,453,402                                                        |
| Final particle images (no.)                      | 139,830                                                 | 119,846                                                 | 64,173                                                          | 102,190                                                          |
| Map resolution (Å)                               | 2.71                                                    | 3.59                                                    | 3.13                                                            | 2.96                                                             |
| FSC threshold                                    | 0.143                                                   | 0.143                                                   | 0.143                                                           | 0.143                                                            |
| <b>Refinement</b>                                |                                                         |                                                         |                                                                 |                                                                  |
| Initial model used (PDB code)                    | 8v2g                                                    | 6cno                                                    | 8v2g                                                            | 8v2g                                                             |
| Model resolution (Å)                             | 2.8                                                     | 3.7                                                     | 3.2                                                             | 3.0                                                              |
| FSC threshold                                    | 0.5                                                     | 0.5                                                     | 0.5                                                             | 0.5                                                              |
| Map sharpening <i>B</i> factor (Å <sup>2</sup> ) | -29.1                                                   | 37.73                                                   | 6.48                                                            | -16.18                                                           |
| Model composition                                |                                                         |                                                         |                                                                 |                                                                  |
| Non-hydrogen atoms                               | 15539                                                   | 15255                                                   | 16403                                                           | 16057                                                            |
| Protein residues                                 | 2024                                                    | 2024                                                    | 2096                                                            | 2096                                                             |
| Ligands                                          | K: 3, CA: 8                                             | K: 3, CA: 8                                             | K: 3, CA: 8                                                     | K: 2                                                             |
| <i>B</i> factors (Å <sup>2</sup> )               |                                                         |                                                         |                                                                 |                                                                  |
| Protein                                          | 76.31                                                   | 25.41                                                   | 42.57                                                           | 88.95                                                            |
| Ligand                                           | 104.99                                                  | 29.49                                                   | 41.61                                                           | 105.19                                                           |
| R.m.s. deviations                                |                                                         |                                                         |                                                                 |                                                                  |
| Bond lengths (Å)                                 | 0.006                                                   | 0.003                                                   | 0.003                                                           | 0.004                                                            |
| Bond angles (°)                                  | 0.561                                                   | 0.465                                                   | 0.505                                                           | 0.519                                                            |
| Validation                                       |                                                         |                                                         |                                                                 |                                                                  |
| MolProbity score                                 | 1.51                                                    | 1.21                                                    | 1.32                                                            | 1.33                                                             |
| Clashscore                                       | 4.26                                                    | 2.09                                                    | 2.35                                                            | 2.84                                                             |
| Poor rotamers (%)                                | 0.00                                                    | 0.00                                                    | 0.00                                                            | 0.00                                                             |
| Ramachandran plot                                |                                                         |                                                         |                                                                 |                                                                  |
| Favored (%)                                      | 95.67                                                   | 96.50                                                   | 5.67                                                            | 96.15                                                            |
| Allowed (%)                                      | 4.33                                                    | 3.50                                                    | 4.33                                                            | 3.85                                                             |
| Disallowed (%)                                   | 0.00                                                    | 0.00                                                    | 0.00                                                            | 0.00                                                             |

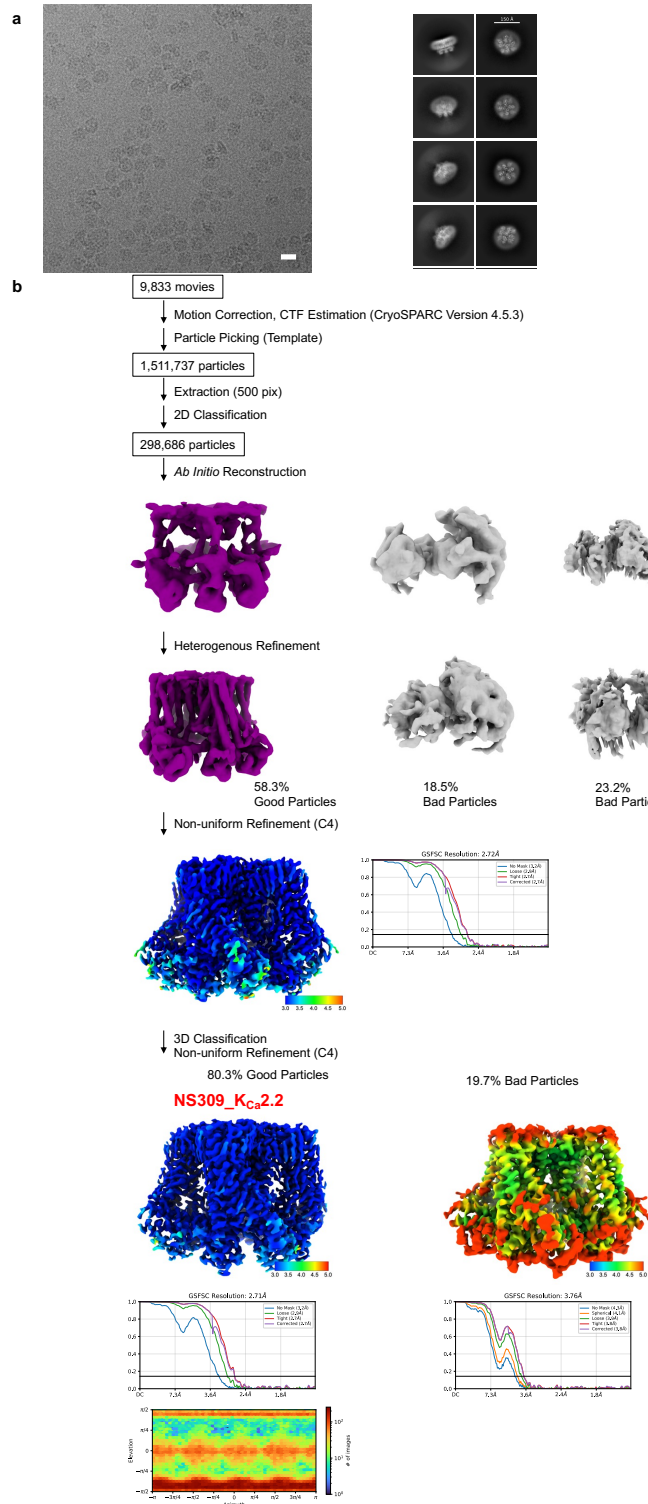

**Supplementary Fig. 1 Single-particle cryo-EM analysis procedure for the NS309\_K<sub>Ca</sub>2.2 complex.** **a** A representative cryo-EM micrograph and two-dimensional classification averages of the NS309\_K<sub>Ca</sub>2.2 complex. Scale bar (200 Å) is shown in white inside the micrograph. **b** Cryo-EM data processing workflow of the NS309\_K<sub>Ca</sub>2.2 complex. The cryo-EM map used for model building is labeled in red font.

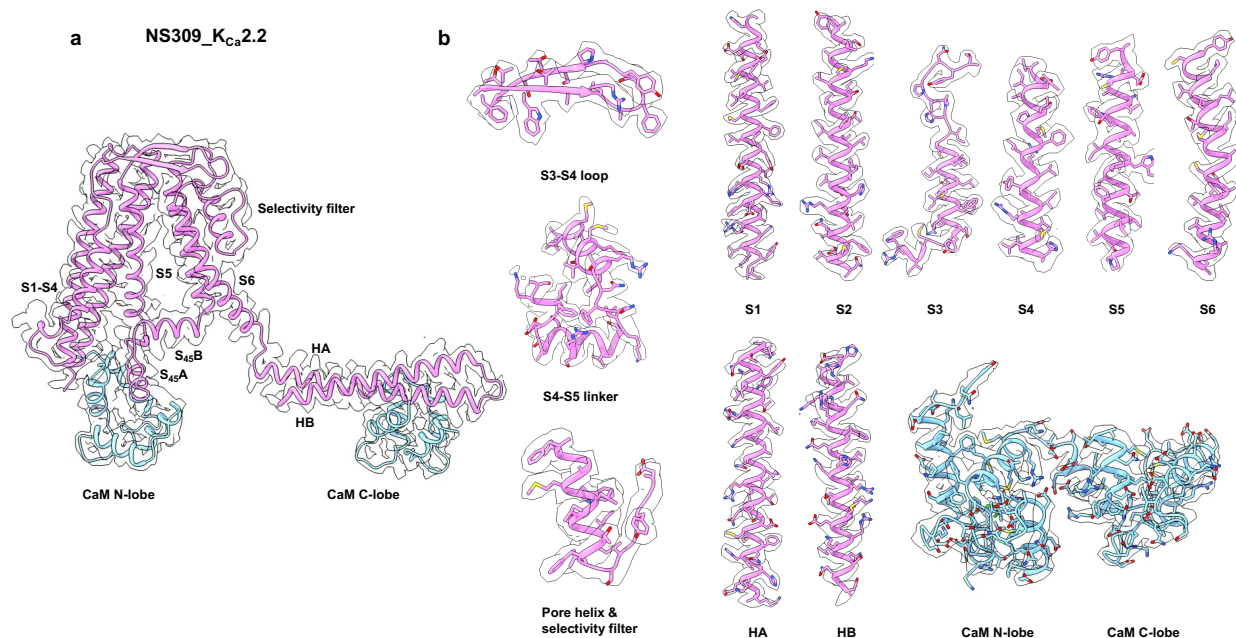

**Supplementary Fig. 2 Cryo-EM density maps with fitted models of NS309\_K<sub>Ca</sub>2.2.** **a** Single subunit of NS309\_K<sub>Ca</sub>2.2 including S1-S6 transmembrane domains and pore domain (purple). One CaM bound to the S4-S5 linker, and one CaM bound to the HA/HB helices in the C-terminus are shown in light blue. **b** Cryo-EM density map with the fitted model of NS309\_K<sub>Ca</sub>2.2 showing side chain densities in the S3-S4 loop, S4-S5 linker, S1 to S6 helices, pore helix and selectivity filter, HA/HB helices in the C-terminus, CaM N-lobe, and CaM C-lobe.



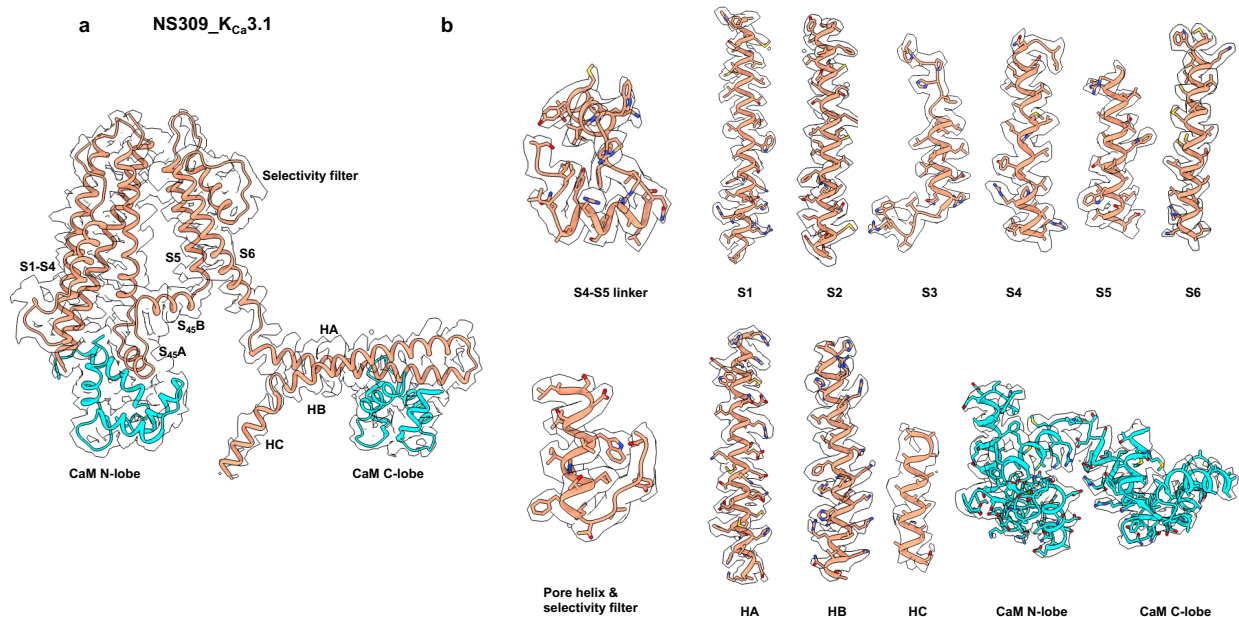

**Supplementary Fig. 4 Cryo-EM density map with fitted models of NS309\_K<sub>Ca</sub>3.1.** **a** Single subunit of NS309\_K<sub>Ca</sub>3.1 including S1-S6 transmembrane domains and pore domain (salmon). One CaM bound to the S4-S5 linker and one CaM bound to the HA/HB helices in the C-terminus are shown in cyan. **b** Cryo-EM density map with the fitted model of NS309\_K<sub>Ca</sub>3.1 showing side chain densities in the S4-S5 linker, S1 to S6 helices, pore helix and selectivity filter, HA, HB and HC helices in the C-terminus, CaM N-lobe, and CaM C-lobe.

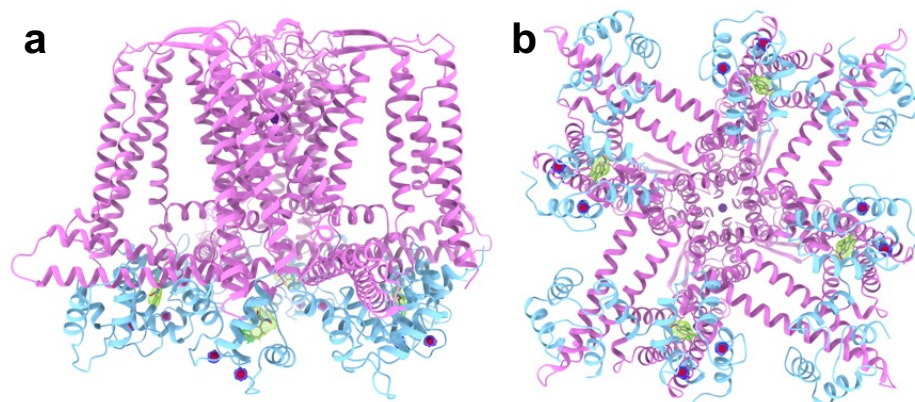

**Supplementary Fig. 5 Densities of  $\text{Ca}^{2+}$  and NS309 in NS309\_KCa2.2.** Side view (a) and intracellular view (b) of NS309\_KCa2.2 (KCa2.2: purple/CaM: light blue). Cryo-EM densities for  $\text{Ca}^{2+}$  and NS309 are shown as blue and green mesh, respectively. The densities are contoured at  $\sigma = 6$ .

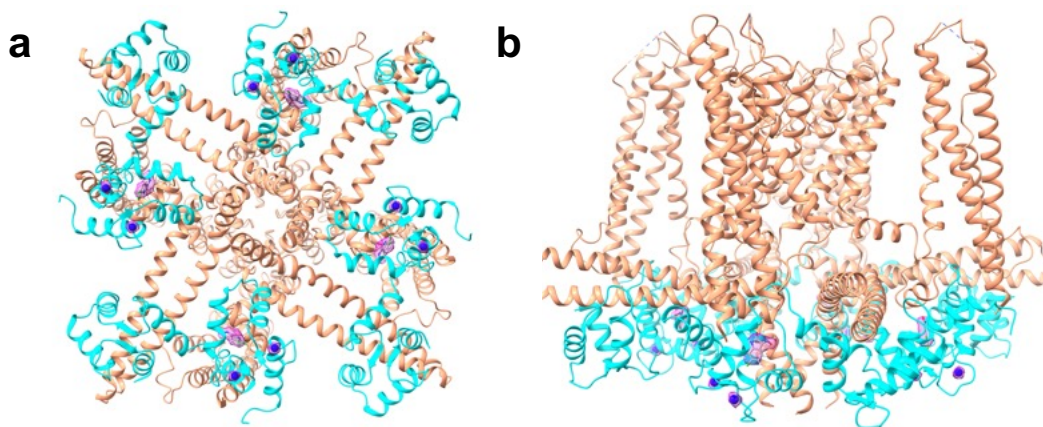

**Supplementary Fig. 6 Densities of  $\text{Ca}^{2+}$  and NS309 in NS309\_KCa3.1.** Side view (a) and intracellular view (b) of NS309\_KCa3.1 (KCa3.1: salmon/CaM: cyan). Cryo-EM densities for  $\text{Ca}^{2+}$  and NS309 are shown as magenta mesh. The densities are contoured at  $\sigma = 6$ .

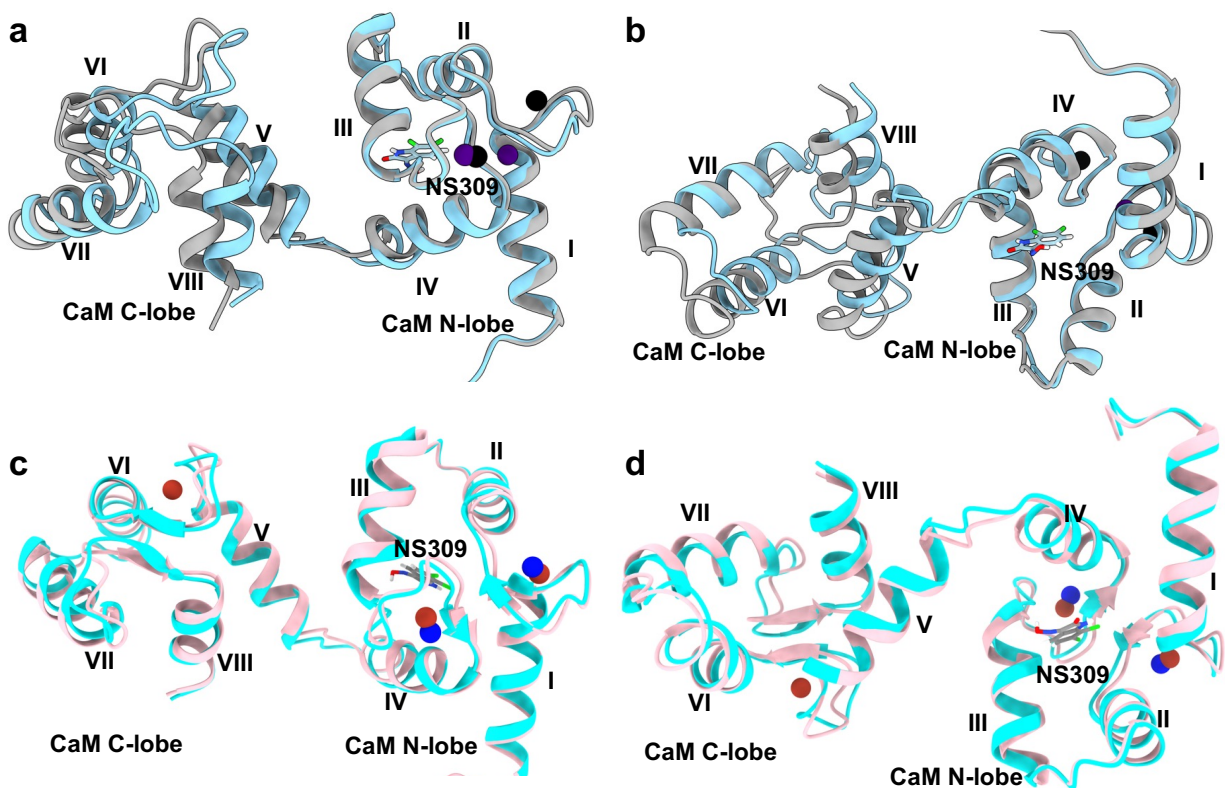

**Supplementary Fig. 7 Conformations of CaM in NS309\_KCa2.2 and NS309\_KCa3.1.** **a** A  $\text{Ca}^{2+}$ -bound CaM molecule of NS309\_KCa2.2 (CaM: blue/ $\text{Ca}^{2+}$ : indigo blue) superimposed on a  $\text{Ca}^{2+}$ -bound CaM of apo\_KCa2.2 (CaM: gray/ $\text{Ca}^{2+}$ : black) with the hydrophobic surfaces at the N- and C-lobes facing away. **b** One  $\text{Ca}^{2+}$ -bound CaM molecule of NS309\_KCa2.2 superimposed on a  $\text{Ca}^{2+}$ -bound CaM of apo\_KCa2.2 with the hydrophobic surfaces at the N- and C-lobes facing the viewer. **c** A  $\text{Ca}^{2+}$ -bound CaM molecule of NS309\_KCa3.1 (CaM: cyan/ $\text{Ca}^{2+}$ : blue) superimposed on a  $\text{Ca}^{2+}$ -bound CaM of apo\_KCa3.1 (CaM: pink/ $\text{Ca}^{2+}$ : maroon) with the hydrophobic surfaces at the N- and C-lobes facing away. **d** One  $\text{Ca}^{2+}$ -bound CaM molecule of NS309\_KCa3.1 superimposed on a  $\text{Ca}^{2+}$ -bound CaM of apo\_KCa3.1 with the hydrophobic surfaces at the N- and C-lobes facing the viewer.

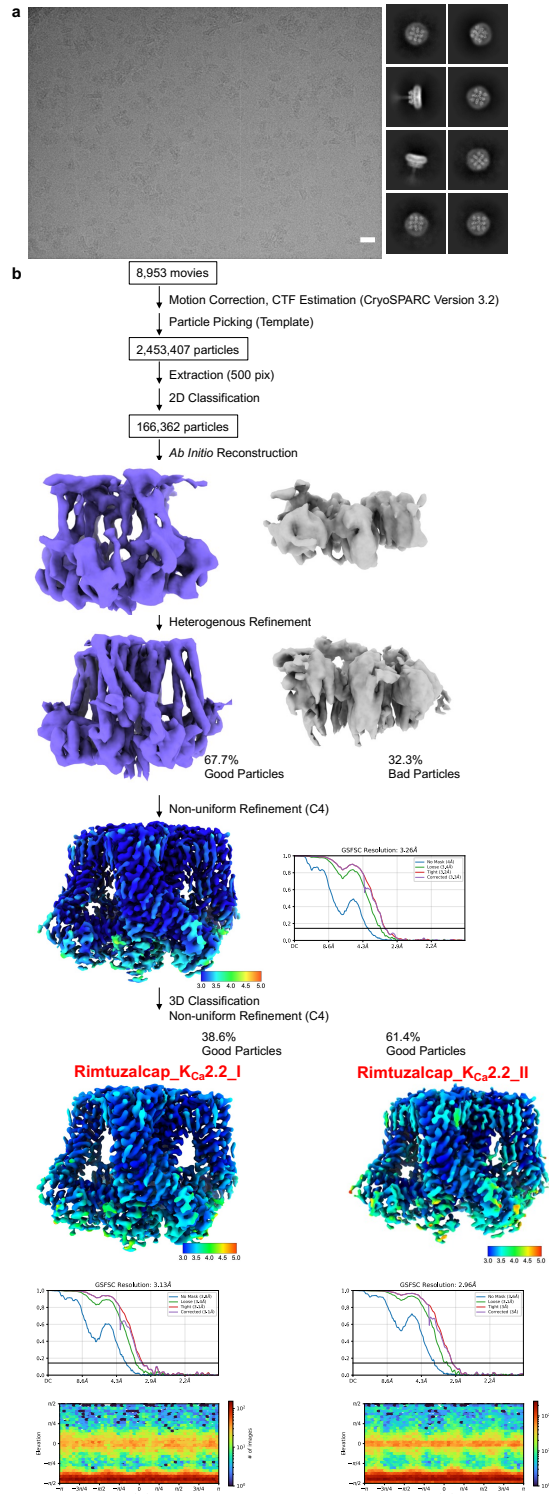

**Supplementary Fig. 8 Single-particle cryo-EM analysis procedure for the rimtuzalcap\_K<sub>Ca</sub>2.2 complex.** **a** A representative cryo-EM micrograph and two-dimensional classification averages of the rimtuzalcap\_K<sub>Ca</sub>2.2 complex. Scale bar (200 Å) is shown in white inside the micrograph. **b** Cryo-EM data processing workflow of the rimtuzalcap\_K<sub>Ca</sub>2.2 complex. The cryo-EM maps used for model building are labeled in red font.

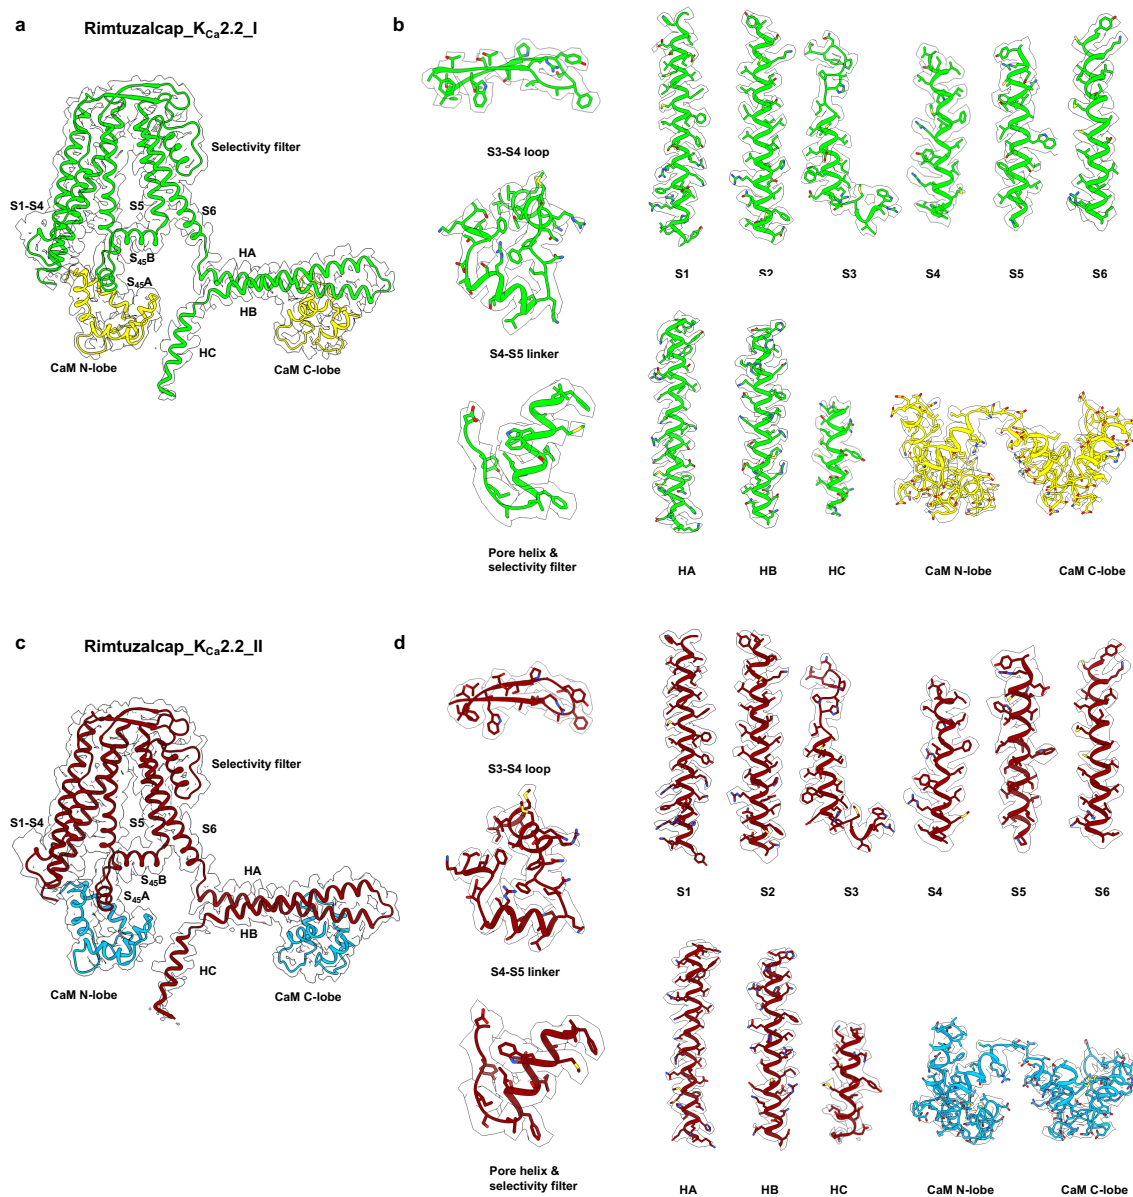

**Supplementary Fig. 9 Cryo-EM density map with fitted models of rimtuzalcap\_KCa2.2\_I and rimtuzalcap\_KCa2.2\_II.** **a** Single subunit of rimtuzalcap\_KCa2.2\_I including S1-S6 transmembrane domains and pore domain (green). One CaM bound to the S4-S5 linker, and one CaM bound to the HA/HB helices in the C-terminus are shown in yellow. **b** Cryo-EM density map with the fitted model of rimtuzalcap\_KCa2.2\_I showing side chain densities in the S3-S4 loop, S4-S5 linker, S1 to S6 helices, pore helix and selectivity filter, HA, HB, and HC helices in the C-terminus, CaM N-lobe, and CaM C-lobe. **c** Single subunit of rimtuzalcap\_KCa2.2\_II including S1-S6 domains and pore domain (green). One CaM bound to the S4-S5 linker, and one CaM bound to the HA/HB helices in the C-terminus are shown in yellow. **d** Cryo-EM density map with the fitted model of rimtuzalcap\_KCa2.2\_II showing side chain densities in the S3-S4 loop, S4-S5 linker, S1 to S6 helices, pore helix and selectivity filter, HA, HB, and HC helices in the C-terminus, CaM N-lobe, and CaM C-lobe.

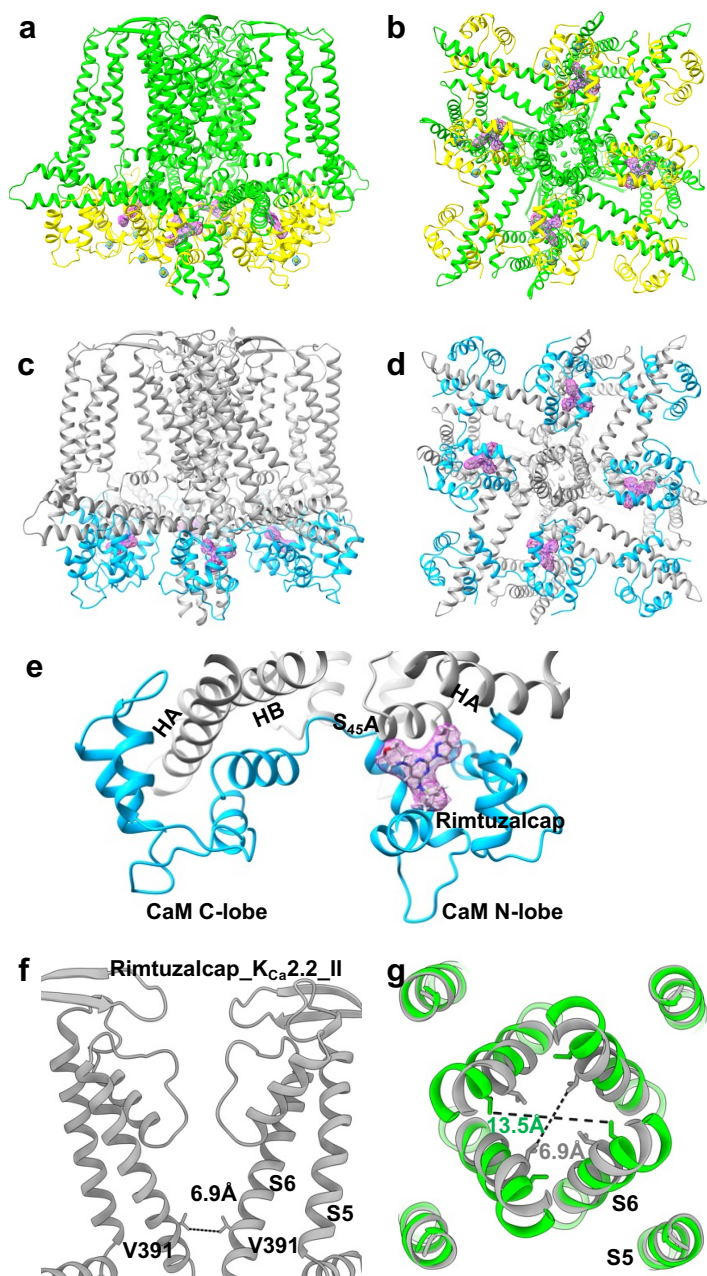

**Supplementary Fig. 10 Comparison of rimtuzalcap\_KCa2.2\_I and rimtuzalcap\_KCa2.2\_II.** Side view (a) and intracellular view (b) of rimtuzalcap\_KCa2.2\_I (KCa2.2: green/CaM: yellow). Side view (c) and intracellular view (d) of rimtuzalcap\_KCa2.2\_II (KCa2.2: gray/CaM: cyan). Cryo-EM densities for Ca<sup>2+</sup> and rimtuzalcap are shown as magenta mesh. e Cryo-EM densities for rimtuzalcap bound to one CaM molecule is shown as magenta mesh. In rimtuzalcap\_KCa2.2\_II, density for Ca<sup>2+</sup> is not present. The densities are contoured at  $\sigma = 6$ . f In the side view, the dimension of the inner gate are measured as distances between Val391 in the transmembrane S6 helices of the opposite KCa2.2 subunits in rimtuzalcap\_KCa2.2\_II. g The intercellular views of the inner gate in the superimposed rimtuzalcap\_KCa2.2\_I (green) and rimtuzalcap\_KCa2.2\_II (gray) structures.
